# Supplementary material for: Visualization of Protease Activity In Vivo Using an Activatable Photo-Acoustic Imaging Probe Based on CuS Nanoparticles
Source: PubMed Central journal article supplement — Theranostics. 2014 Jan 2;4(2):134–41. doi: 10.7150/thno.7217 (PMC3900798; doi:10.7150/thno.7217), 2014-01-02
Supplement: thnov04p0134s1.pdf [file thnov04p0134s1.pdf]

## Supplementary Material

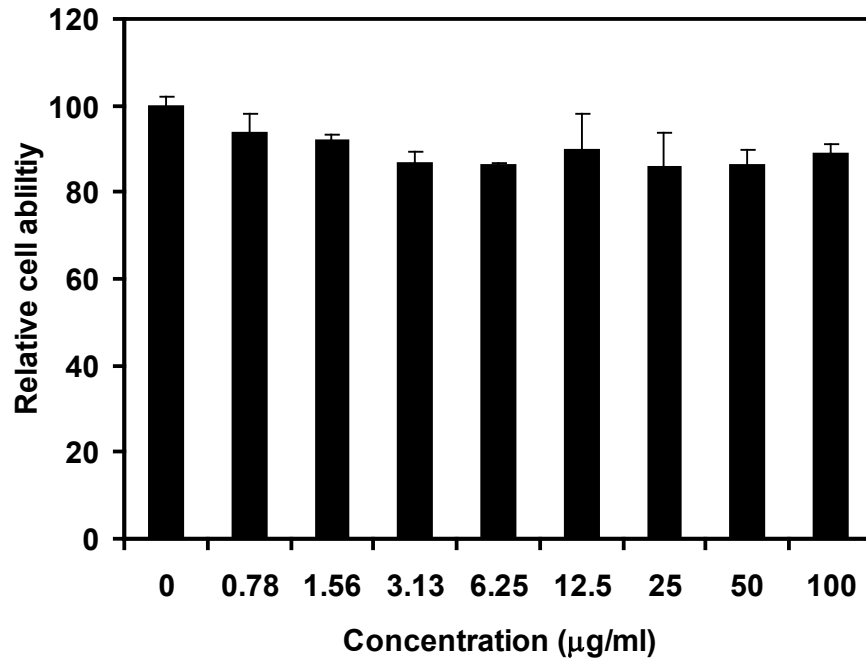

**Figure S1**, In vitro toxicity test of CuS nanoparticles to SCC7 cells (incubation time = 24 h) was determined by the standard MTT assay. No obviously toxicity was observed even at high concentrations.

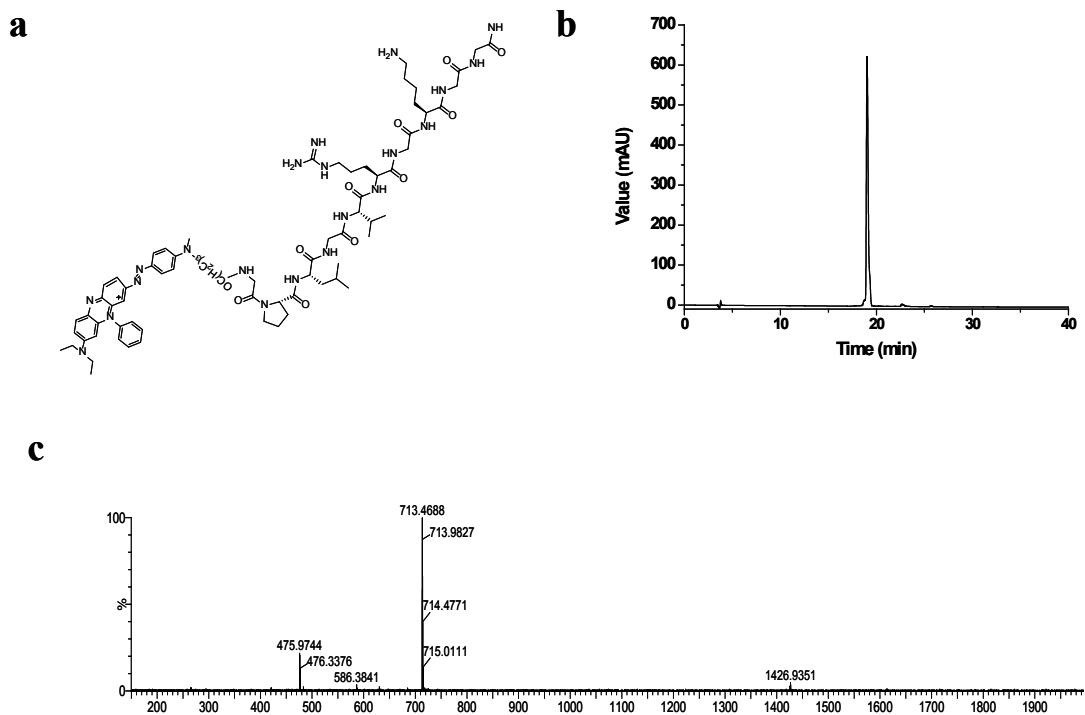

**Figure S2.** Synthesis and characterization of peptide-BHQ3. (a) Chemical structure of peptide-BHQ3. The cleavage site is between Gly and Val (b) HPLC spectral of peptide-BHQ3. (c) LC/MS spectrum of peptide-BHQ3

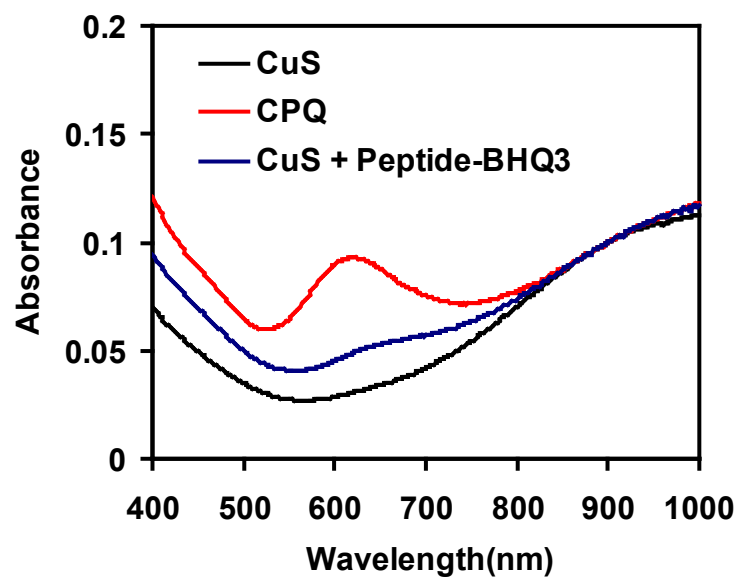

**Figure S3.** UV-vis-NIR spectral of CuS nanoparticles before and after conjugation of peptide-BHQ3. With EDC and NHS activity, peptide-BHQ3 can covalent conjugate to the surface of CuS nanoparticles. In contrast, without EDC adding, just a little of peptide-BHQ3 can adsorbed on the surface of CuS nanoparticles. Therefore, peptide-BHQ3 is covalent conjugated to CuS nanoparticles.
